# Supplementary material for: Angiotensin II Promotes SARS-CoV-2 Infection via Upregulation of ACE2 in Human Bronchial Cells
Source: MDPI journal article supplement (doi:10.3390/ijms23095125), 2022-05-04
Supplement: s1 [file s1]

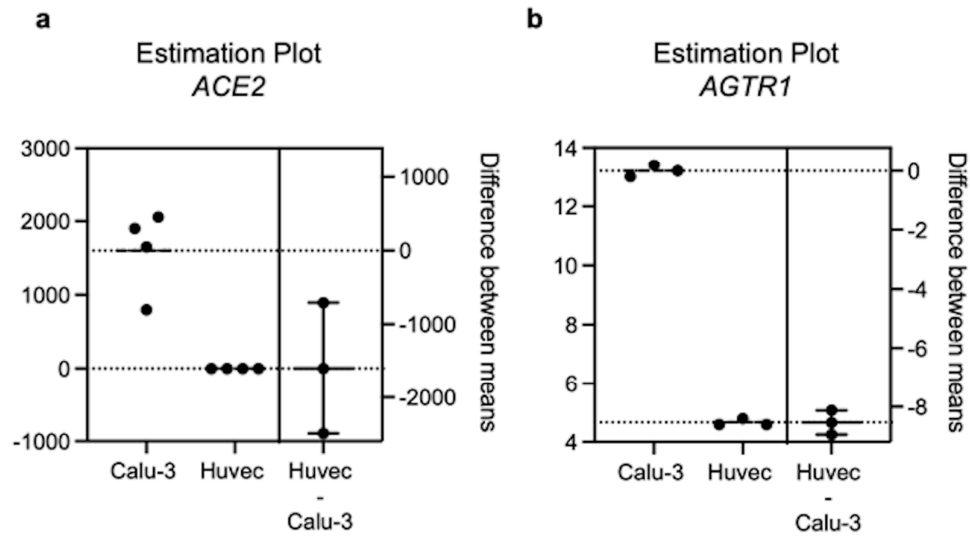

**Figure S1:** *ACE2* and *AGTR1* absolute mRNA levels in Calu-3 cells and HUVEC. *ACE2* and *AGTR1* absolute mRNA levels in Calu-3 cells and HUVEC were measured in basal conditions with ddPCR. Please note the much higher *ACE2* (Panel (a)) and *AGTR1* (Panel (b)) mRNA levels in Calu-3 cells than in HUVEC. Data are shown as copies/10 ng total mRNA (n=4, median  $\pm$  QR, min to max).

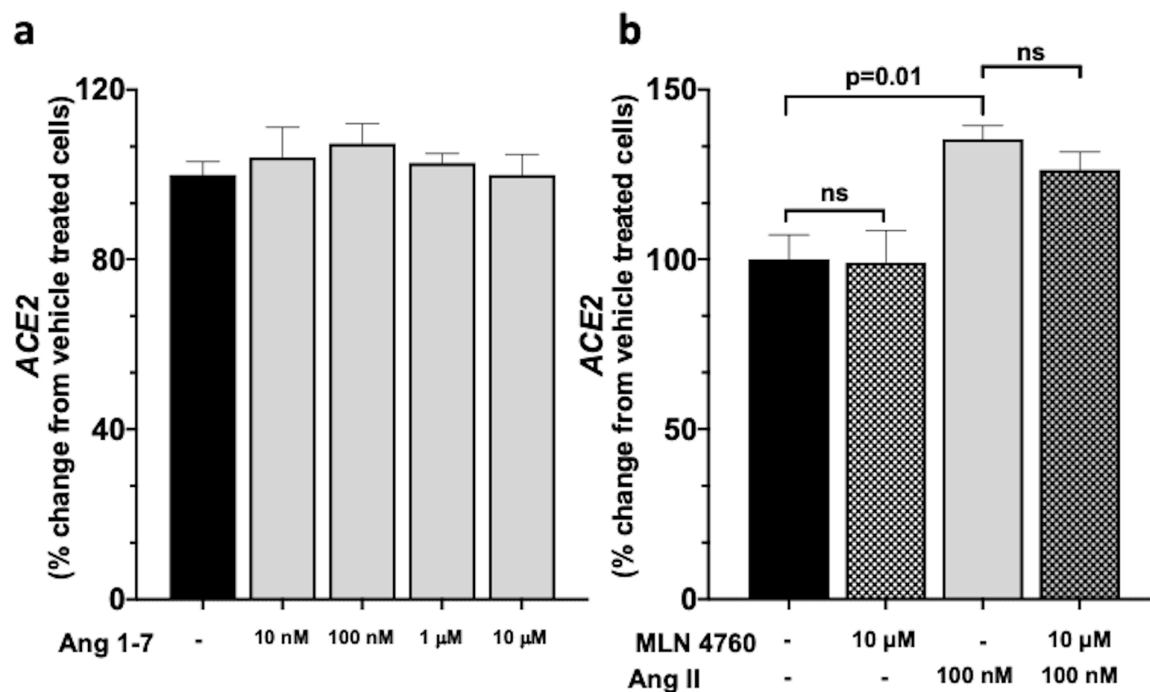

**Figure S2:** Ang 1-7 does not play an effect on *ACE2* gene expression in Calu-3 cells. Panel (a): The bar graph shows *ACE2* gene expression after 12-hours exposure of Calu-3 cells to increasing concentration of Ang 1-7 ranging between 10 nM and 10 μM. Ang 1-7 did not affect *ACE2* gene expression. Data were measured as copies/100 ng total mRNA and then normalized *vs* vehicle treated cells (n=5 in duplicate; mean ± SEM). Panel (b): *ACE2* mRNA levels are not modulated by *ACE2* blockade by MLN-4760 blockade. The graph shows *ACE2* mRNA levels after exposure of Calu-3 cells to 100 nM Ang II in presence of 10 μM MLN-4760. MLN-4760 treatment did not enhance the effect Ang II on *ACE2* gene expression (n=5 in duplicate; median ± SEM).
